# Supplementary material
Source: Springer Nature journal article supplement (https://www.springermedizin.de/resource/supplementary/13613_2011_1_MOESM4_ESM.pdf/15427238)
Supplement: MOESM4 [file 15427238]

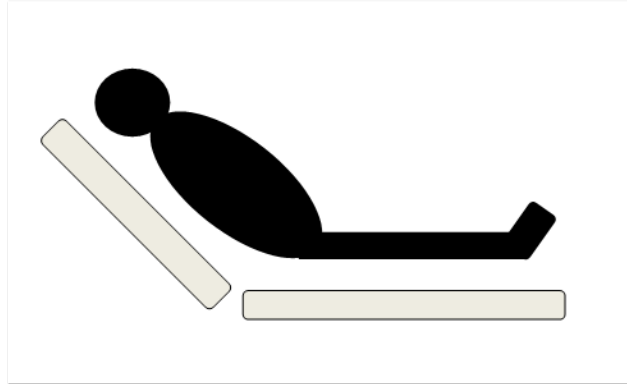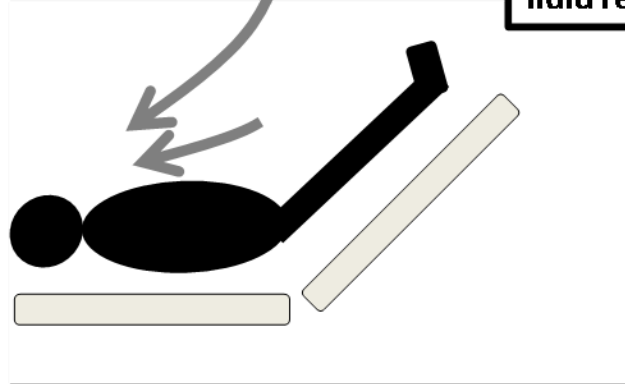

transfer of blood  
from the legs and abdominal  
compartments

= test for  
fluid responsiveness

passive leg raising
